# Supplementary material
Source: Springer Nature journal article supplement (https://www.springermedizin.de/resource/supplementary/12936_2013_3101_MOESM3_ESM.pdf/9545738)
Supplement: MOESM3 [file 9545738]

# Overall Survival

## Time to attaining parasite clearance by treatment

Percentage of patients  
with parasitemia

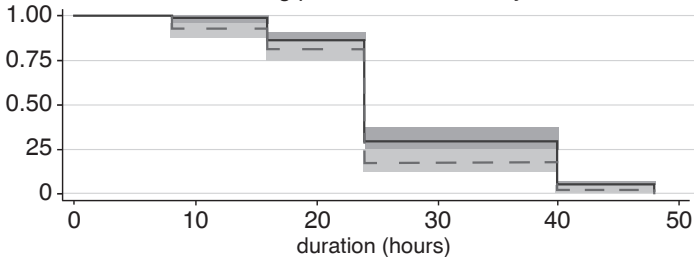

■ 95% CI

— Fixed dose  $AL_d$

■ 95% CI

--- Fixed dose  $DP_p$
